# Supplementary material
Source: publisher figshare collection journal article supplement (https://karger.figshare.com/ndownloader/files/24144197)

**Supplemental Fig. 1.** Boxplot diagram demonstrating statistically significant differences in serum alkaline phosphatase levels on admission between infants with SIP and NEC (*p*<0.0001).


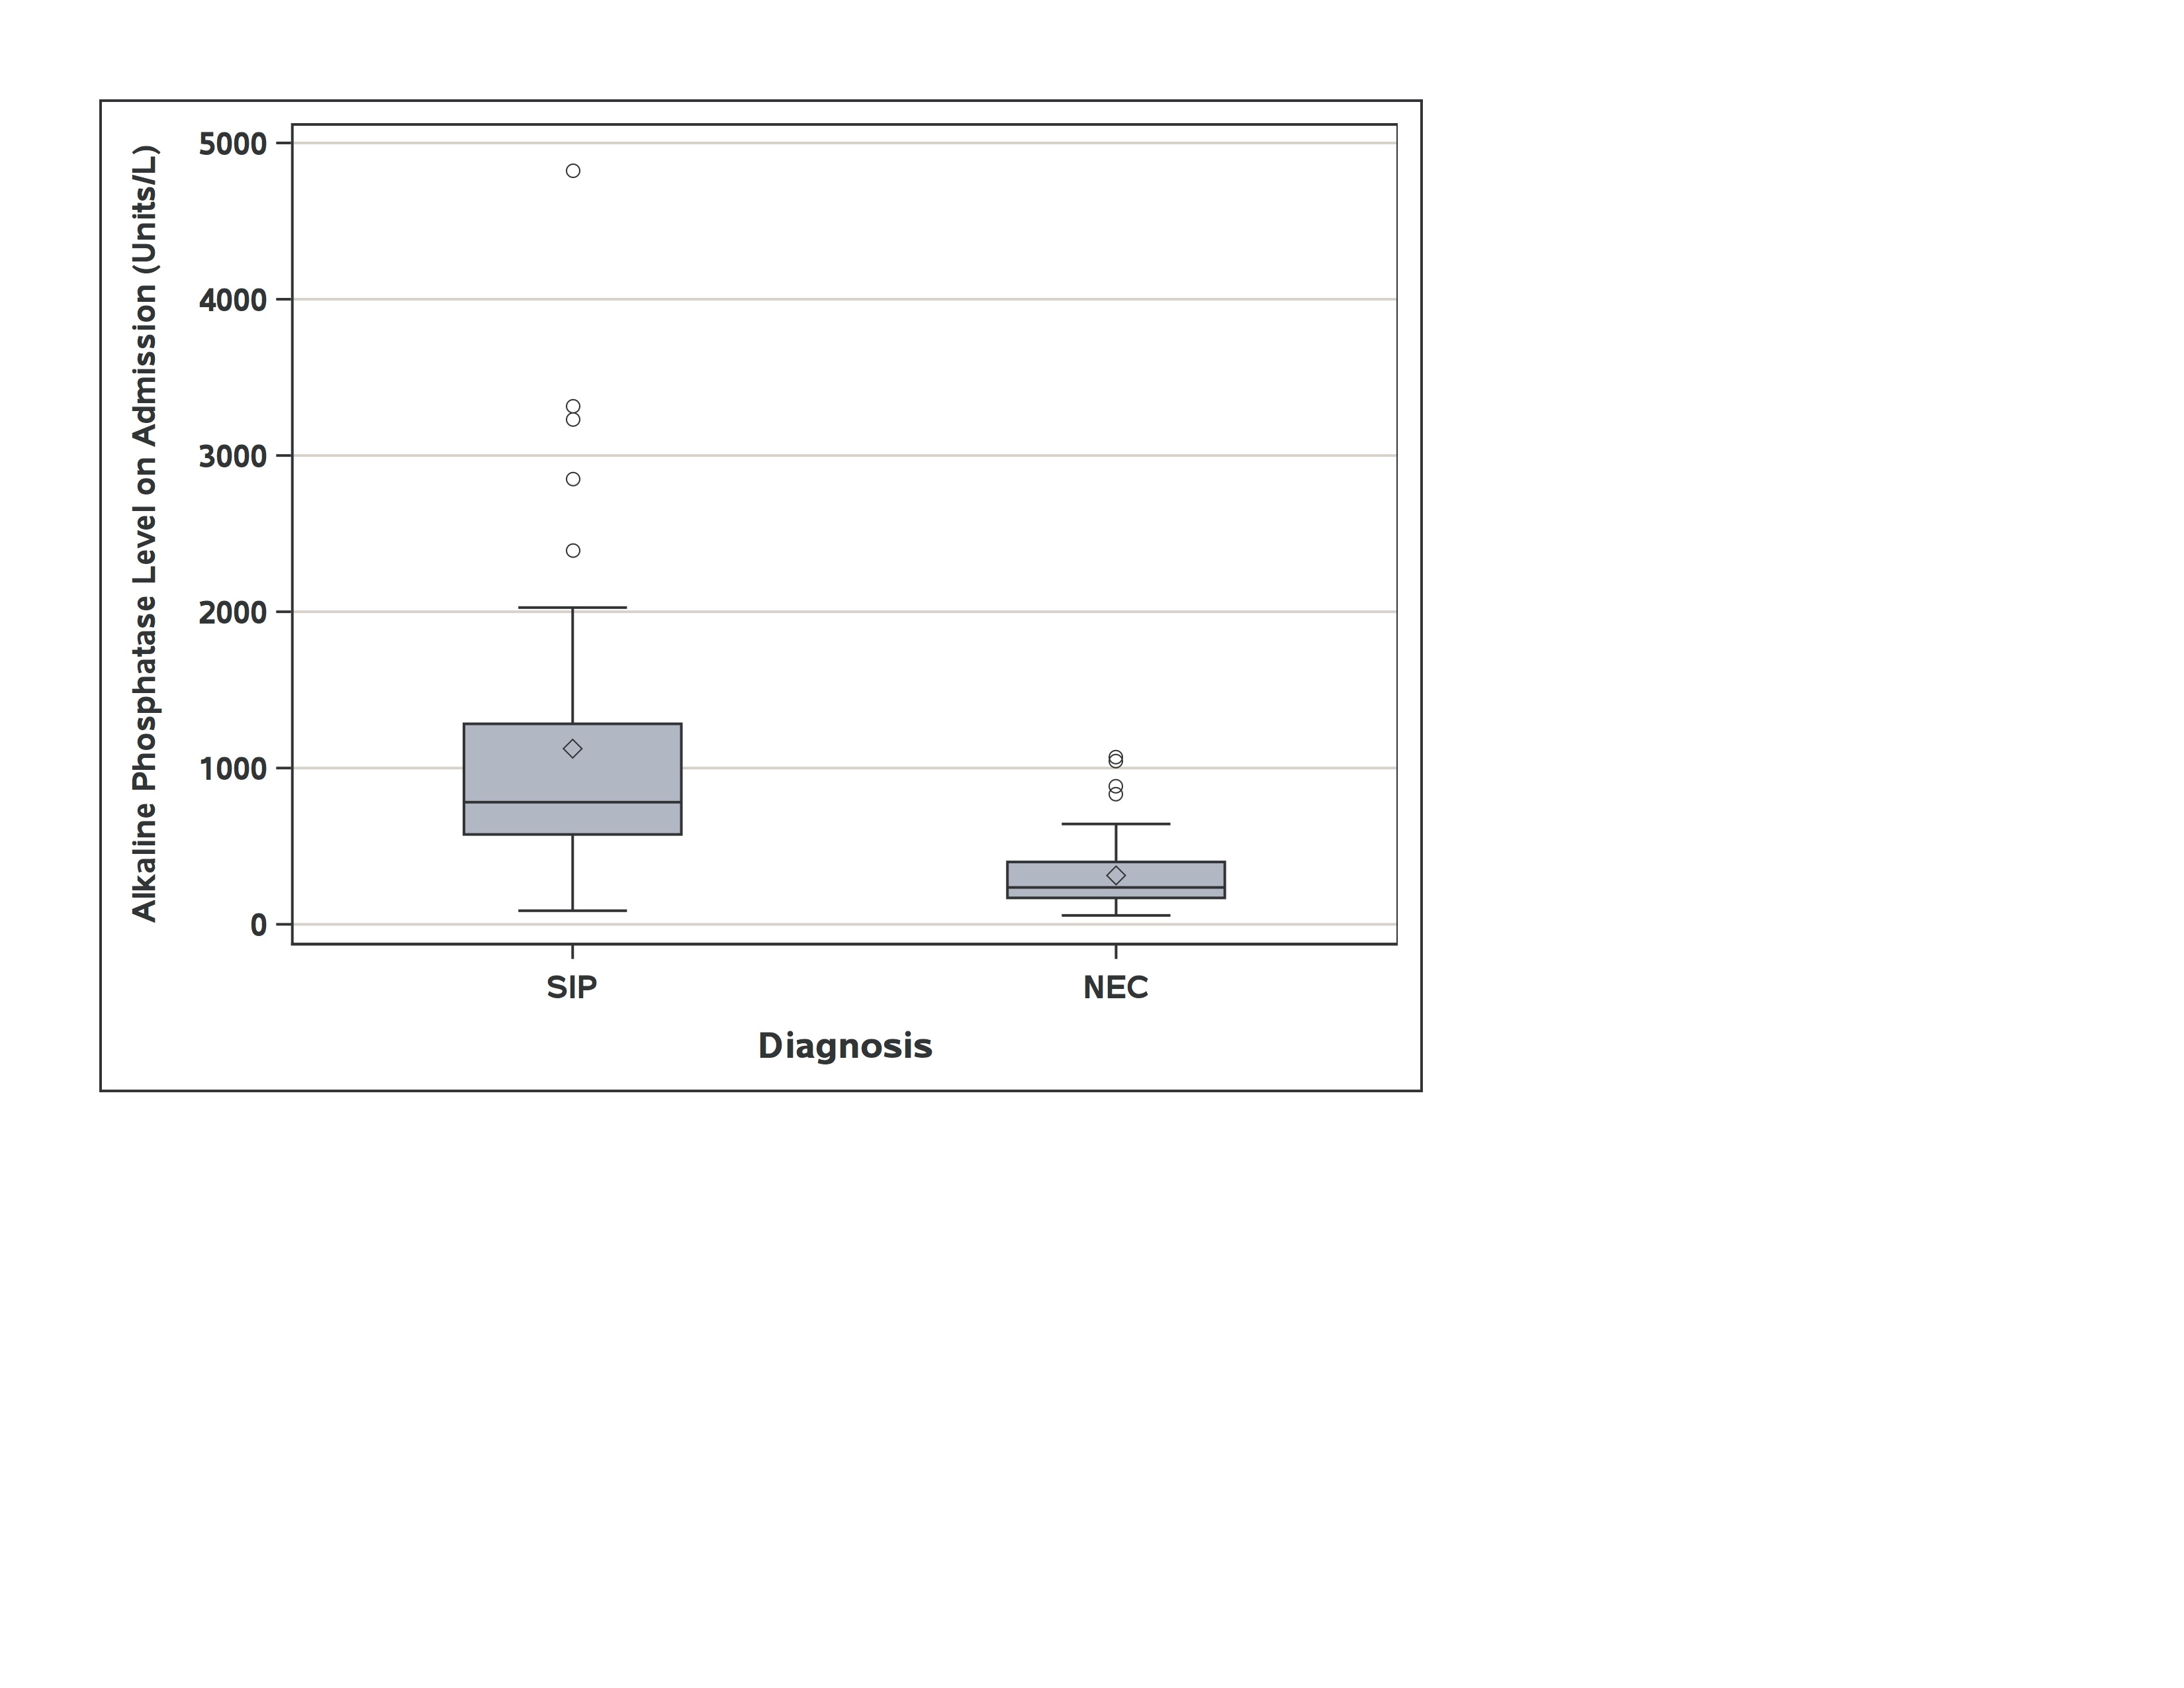


**Supplemental Fig. 2.** Serial changes in serum alkaline phosphatase level based on diagnosis. Each line represents individual changes in each study subject.


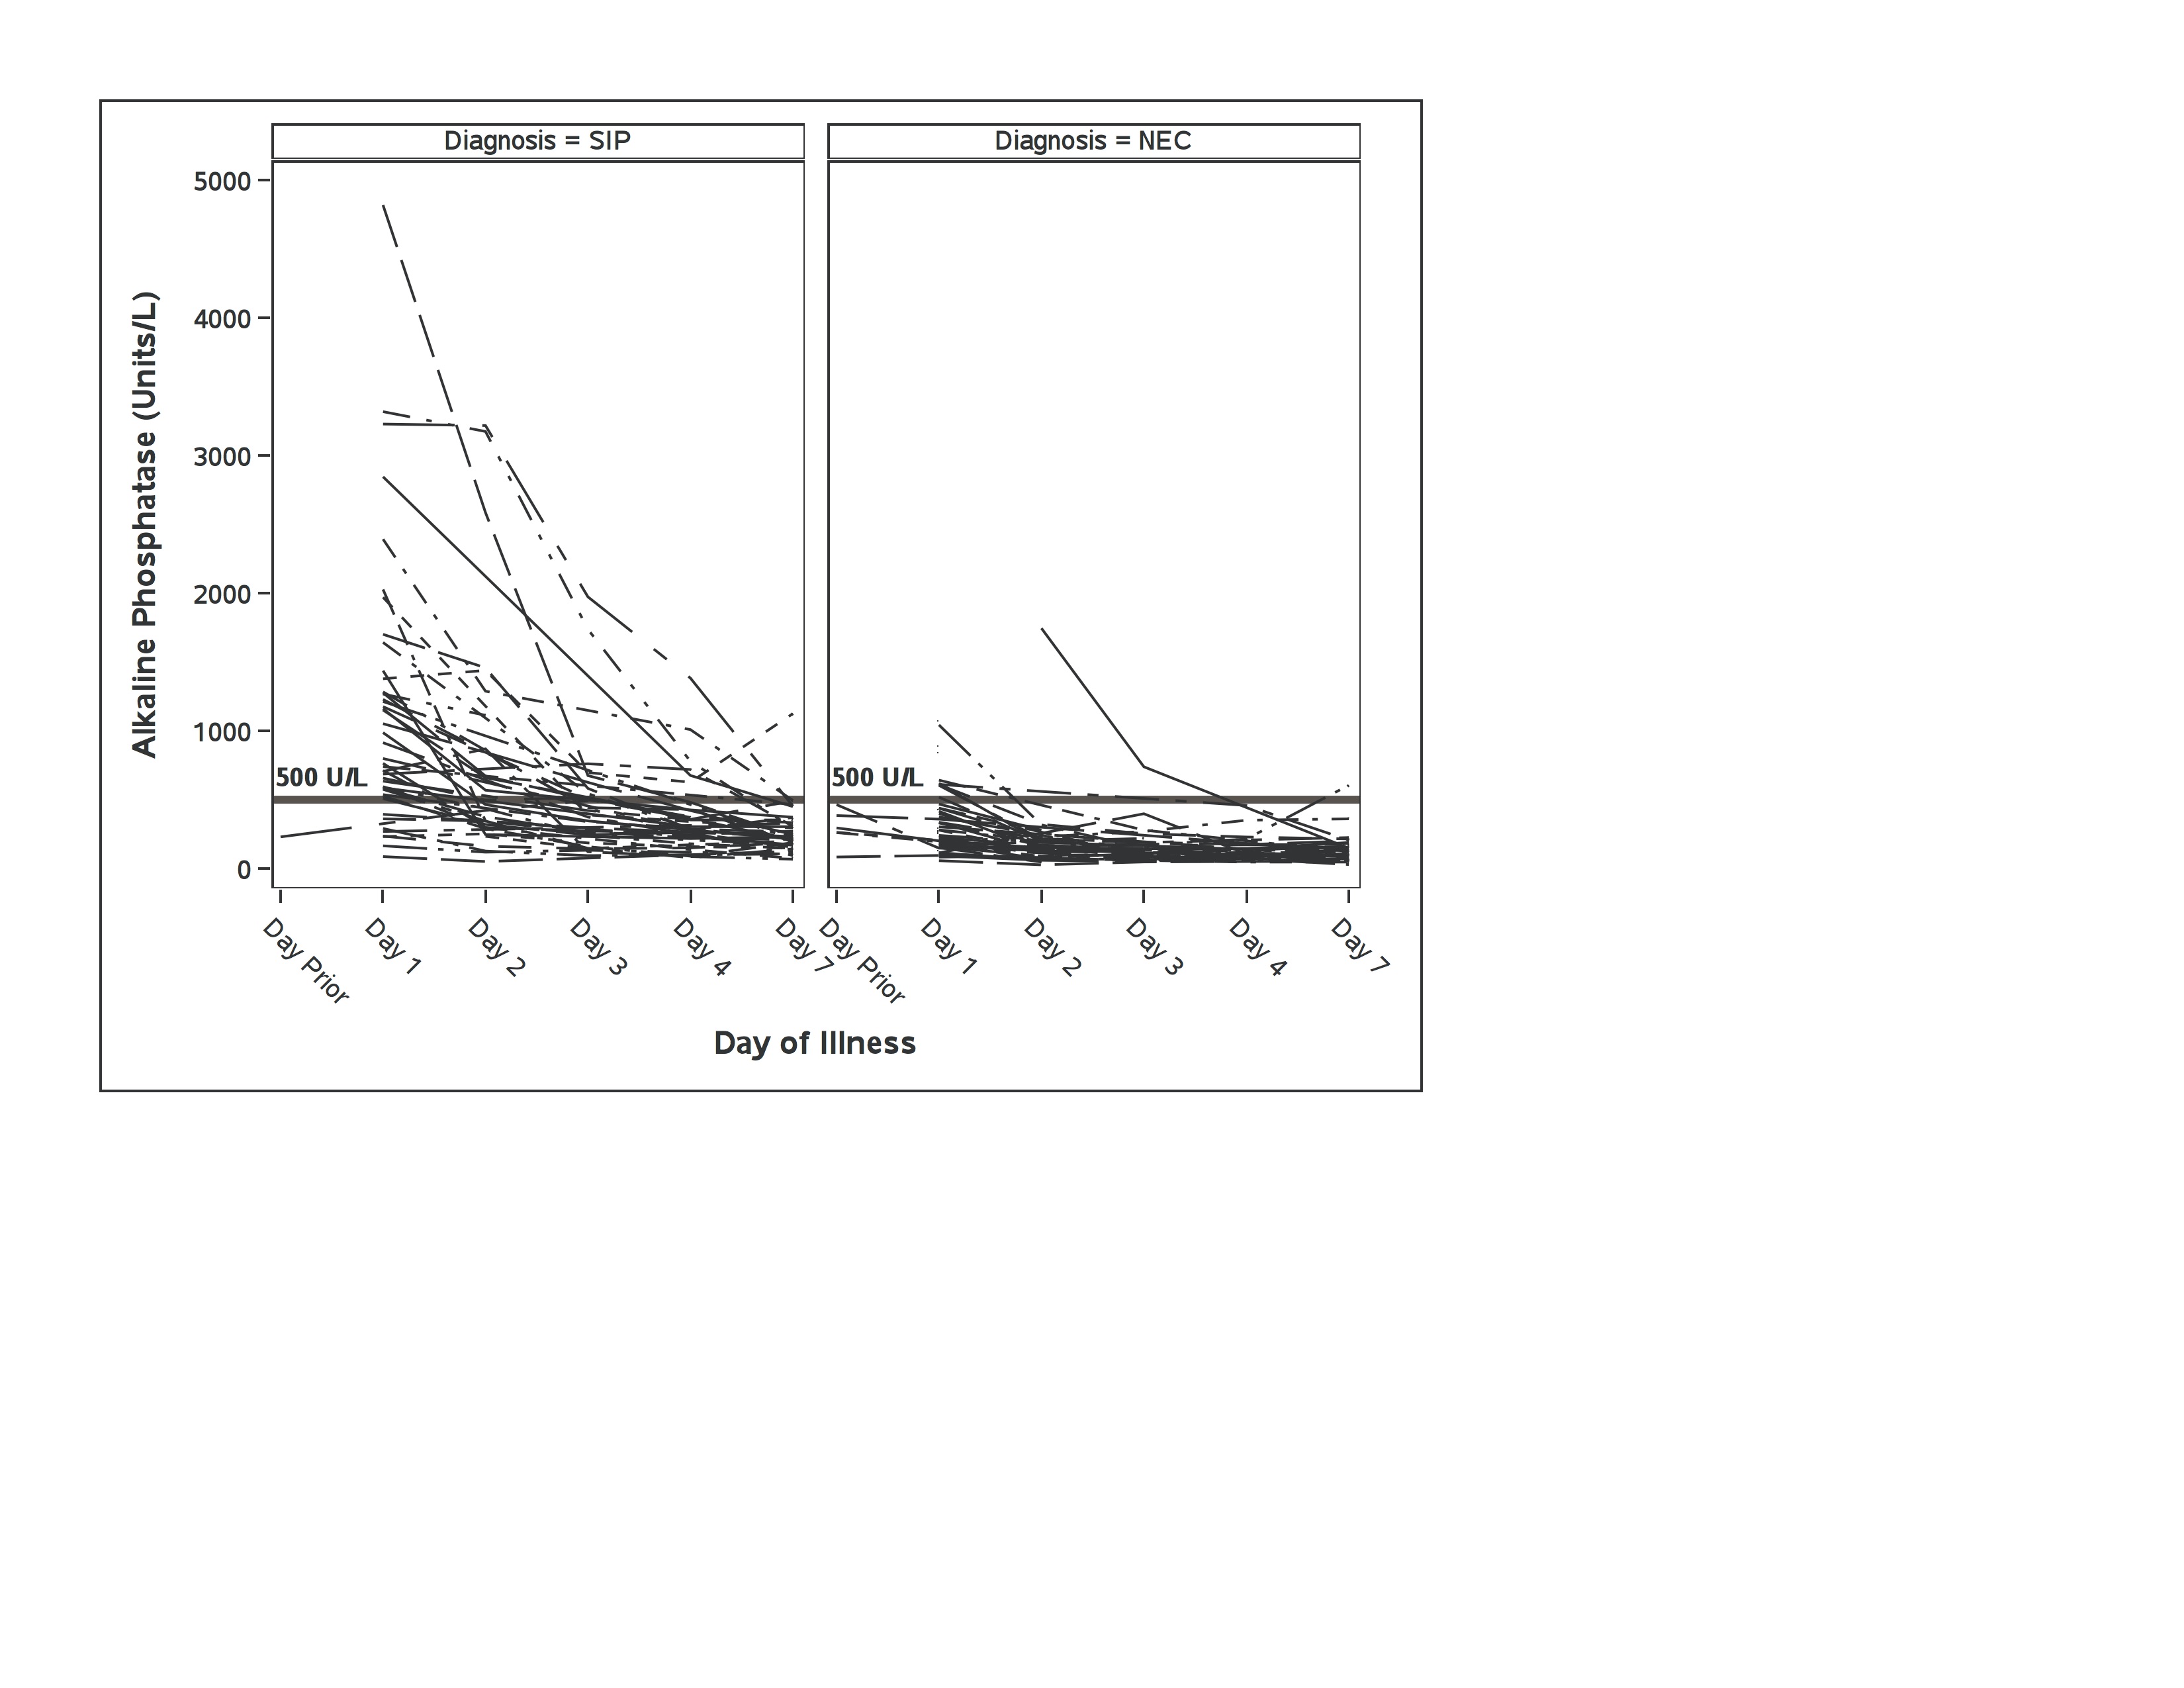


**Supplemental Fig. 3.** Comparison analysis of receiver operating curves (ROC) of the model including serum alkaline phosphatase level >500 units/L alone (dashed line) and the final multivariate model (solid line) demonstrating significantly improved discrimination of the final model (AUC=0.96, p<0.0001).
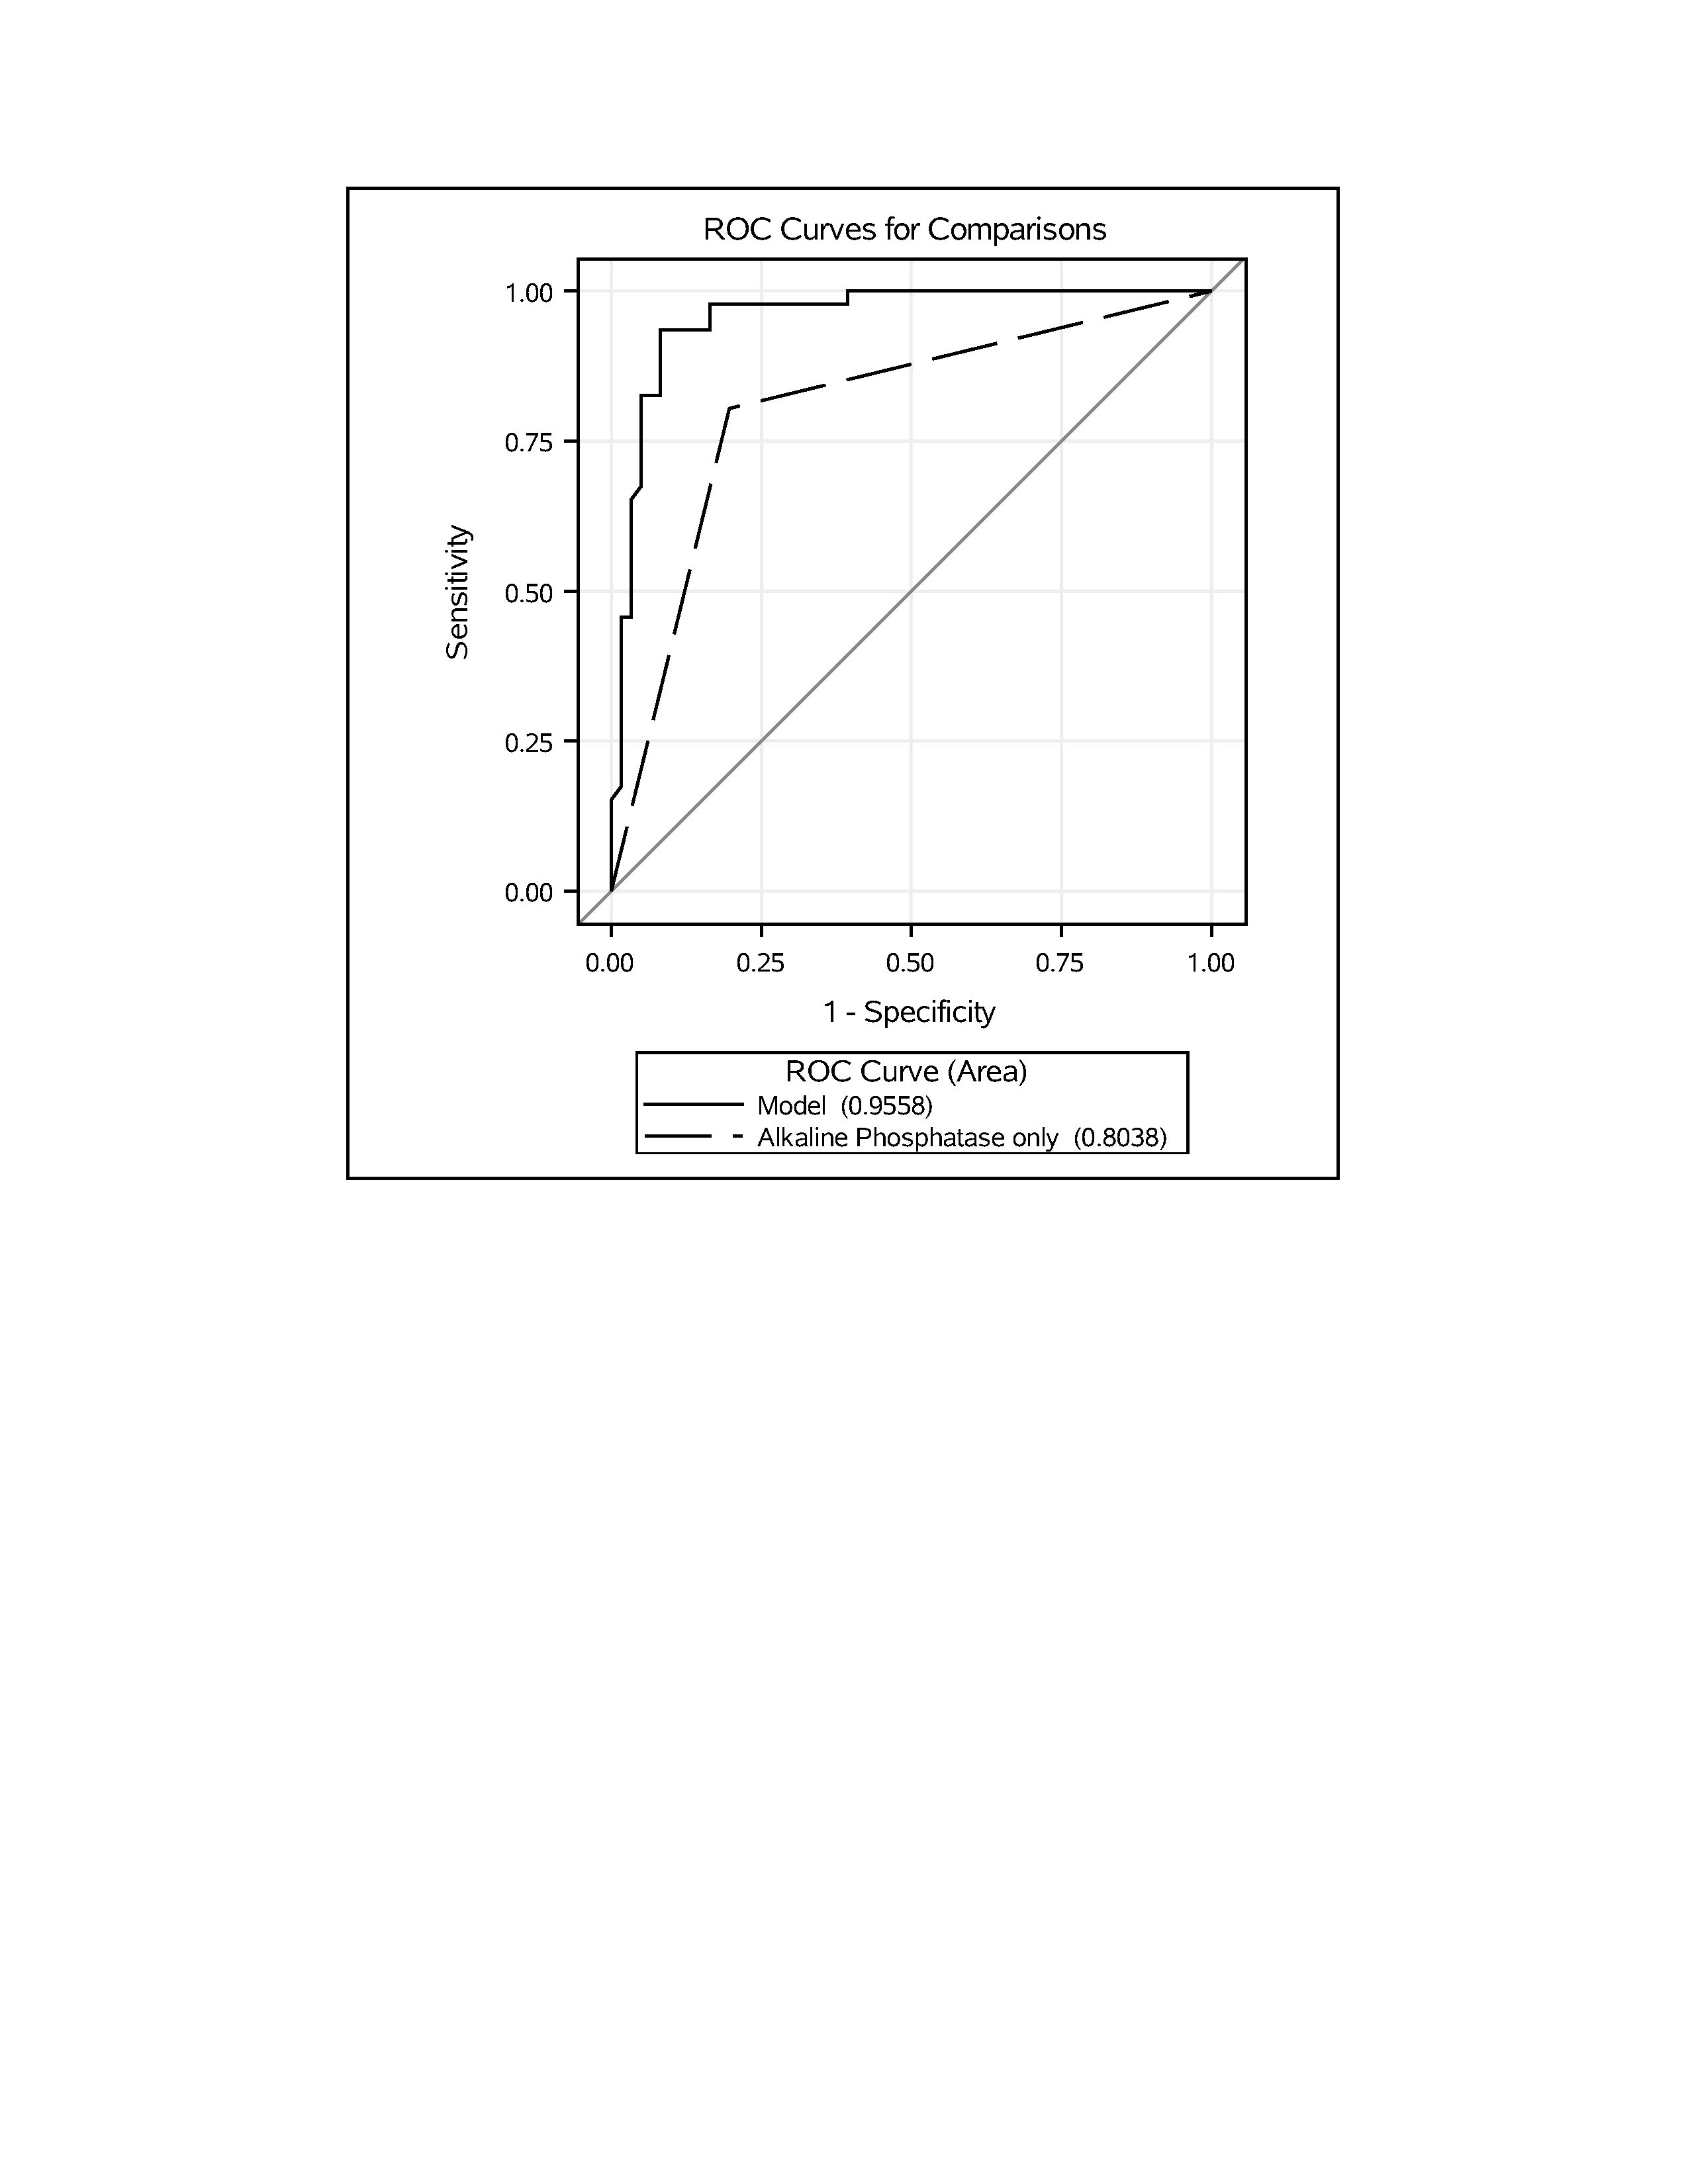

Supplement: Supplementary file 1 [file 24144197]
